# Supplementary material for: Simultaneous Measurement of Cortisol, Cortisone, Dexamethasone and Additional Exogenous Corticosteroids by Rapid and Sensitive LC–MS/MS Analysis
Source: MDPI journal article supplement (doi:10.3390/molecules28010248), 2022-12-28
Supplement: s1 [file s1]

## Supplementary Material

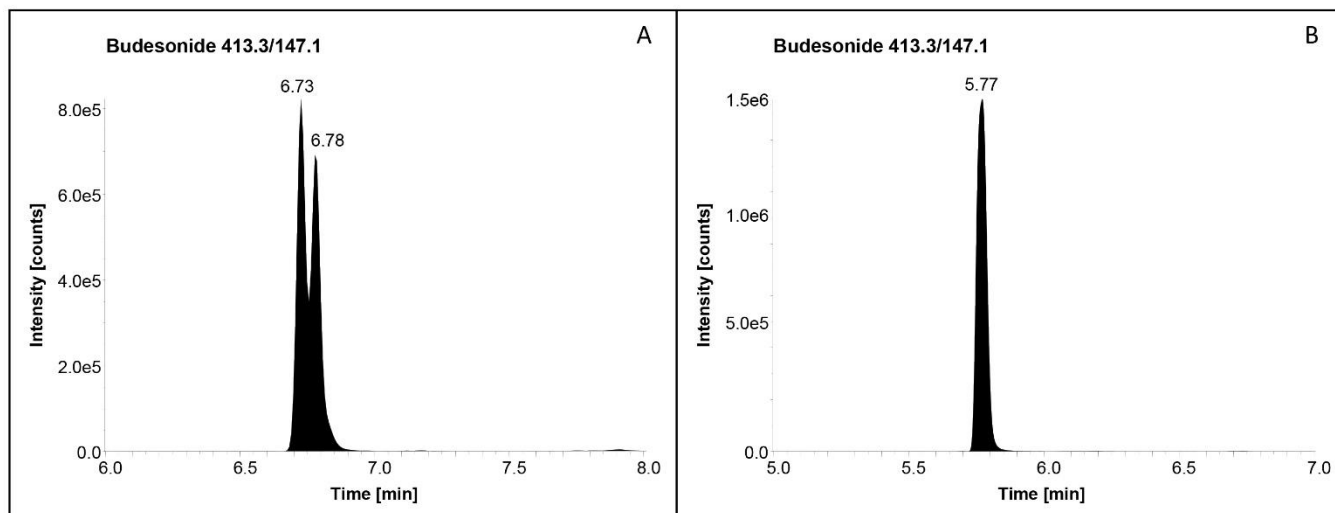

**Figure S1.** Extracted ion chromatograms obtained with (A) initial chromatographic conditions and (B) optimized chromatographic conditions for an extracted negative serum containing budesonide at a concentration of 10 ng/mL.

**Table S1.** Complete list of endogenous steroid hormones included in the mixture used for testing potential interference on analytes' selected MS transition.

| Compound                                   | Chemical Formula                               | Molecular Weight [Da] |
|--------------------------------------------|------------------------------------------------|-----------------------|
| 11 $\alpha$ -Hydroxyprogesterone           | C <sub>21</sub> H <sub>30</sub> O <sub>3</sub> | 330.21895             |
| 11 $\beta$ -Hydroxyandrostenedione         | C <sub>19</sub> H <sub>26</sub> O <sub>3</sub> | 302.18765             |
| 11 $\beta$ -Hydroxyandrosterone            | C <sub>19</sub> H <sub>30</sub> O <sub>3</sub> | 306.21895             |
| 11 $\beta$ -Hydroxyepiandrosterone         | C <sub>19</sub> H <sub>30</sub> O <sub>3</sub> | 306.21895             |
| 11 $\beta$ -Hydroxyetiocholanolone         | C <sub>19</sub> H <sub>30</sub> O <sub>3</sub> | 306.21895             |
| 11 $\beta$ -Hydroxyprogesterone            | C <sub>21</sub> H <sub>30</sub> O <sub>3</sub> | 330.21895             |
| 11 $\beta$ -Hydroxytestosterone            | C <sub>19</sub> H <sub>28</sub> O <sub>3</sub> | 304.20330             |
| 11-Dehydrocorticosterone                   | C <sub>21</sub> H <sub>28</sub> O <sub>4</sub> | 344.19821             |
| 11-Deoxycorticosterone                     | C <sub>21</sub> H <sub>30</sub> O <sub>3</sub> | 330.21895             |
| 11-Deoxycortisol                           | C <sub>21</sub> H <sub>30</sub> O <sub>4</sub> | 346.21386             |
| 11-Ketoandrostenedione                     | C <sub>19</sub> H <sub>24</sub> O <sub>3</sub> | 300.17200             |
| 11-Ketoandrosterone                        | C <sub>19</sub> H <sub>28</sub> O <sub>3</sub> | 304.20330             |
| 11-Ketoetiocholanolone                     | C <sub>19</sub> H <sub>28</sub> O <sub>3</sub> | 304.20330             |
| 11-Ketotestosterone                        | C <sub>19</sub> H <sub>26</sub> O <sub>3</sub> | 302.18765             |
| 15 $\beta$ -Hydroxytestosterone            | C <sub>19</sub> H <sub>28</sub> O <sub>3</sub> | 304.20330             |
| 16 $\alpha$ -Hydroxyandrostenedione        | C <sub>19</sub> H <sub>26</sub> O <sub>3</sub> | 302.18765             |
| 16 $\alpha$ -Hydroxyandrosterone           | C <sub>19</sub> H <sub>30</sub> O <sub>3</sub> | 306.21895             |
| 16 $\alpha$ -Hydroxydehydroepiandrosterone | C <sub>19</sub> H <sub>28</sub> O <sub>3</sub> | 304.20330             |
| 16 $\alpha$ -Hydroxyetiocholanolone        | C <sub>19</sub> H <sub>30</sub> O <sub>3</sub> | 306.21895             |
| 16 $\alpha$ -Hydroxyprogesterone           | C <sub>21</sub> H <sub>30</sub> O <sub>3</sub> | 330.21895             |
| 16 $\alpha$ -Hydroxytestosterone           | C <sub>19</sub> H <sub>28</sub> O <sub>3</sub> | 304.20330             |
| 16 $\beta$ -Hydroxydehydroepiandrosterone  | C <sub>19</sub> H <sub>28</sub> O <sub>3</sub> | 304.20330             |
| 16 $\beta$ -Hydroxytestosterone            | C <sub>19</sub> H <sub>28</sub> O <sub>3</sub> | 304.20330             |

|                                                      |                                                |           |
|------------------------------------------------------|------------------------------------------------|-----------|
| 17 $\alpha$ -Hydroxypregnenolone                     | C <sub>21</sub> H <sub>32</sub> O <sub>3</sub> | 332.23460 |
| 17 $\alpha$ -Hydroxyprogesterone                     | C <sub>21</sub> H <sub>30</sub> O <sub>3</sub> | 330.21895 |
| 19-Hydroxyandrostenedione                            | C <sub>19</sub> H <sub>26</sub> O <sub>3</sub> | 302.18765 |
| 19-Hydroxytestosterone                               | C <sub>19</sub> H <sub>28</sub> O <sub>3</sub> | 304.20330 |
| 20 $\alpha$ -Cortolone                               | C <sub>21</sub> H <sub>34</sub> O <sub>5</sub> | 366.24008 |
| 20 $\alpha$ -Dihydrocortisone                        | C <sub>21</sub> H <sub>30</sub> O <sub>5</sub> | 362.20878 |
| 20 $\alpha$ -Dihydroprogesterone                     | C <sub>21</sub> H <sub>32</sub> O <sub>2</sub> | 316.23968 |
| 20 $\beta$ -Cortolone                                | C <sub>21</sub> H <sub>34</sub> O <sub>5</sub> | 366.24008 |
| 21-Deoxycortisol                                     | C <sub>21</sub> H <sub>30</sub> O <sub>4</sub> | 346.21386 |
| 21-Hydroxypregnenolone                               | C <sub>21</sub> H <sub>32</sub> O <sub>3</sub> | 332.23460 |
| 2 $\beta$ -Hydroxytestosterone                       | C <sub>19</sub> H <sub>28</sub> O <sub>3</sub> | 304.20330 |
| 5 $\alpha$ -Androstane-3 $\alpha$ ,17 $\alpha$ -diol | C <sub>19</sub> H <sub>32</sub> O <sub>2</sub> | 292.23968 |
| 5 $\alpha$ -Androstane-3 $\alpha$ ,17 $\beta$ -diol  | C <sub>19</sub> H <sub>32</sub> O <sub>2</sub> | 292.23968 |
| 5 $\alpha$ -Androstane-3 $\beta$ ,17 $\alpha$ -diol  | C <sub>19</sub> H <sub>32</sub> O <sub>2</sub> | 292.23968 |
| 5 $\alpha$ -Androstane-3 $\beta$ ,17 $\beta$ -diol   | C <sub>19</sub> H <sub>32</sub> O <sub>2</sub> | 292.23968 |
| 5 $\beta$ -Androstane-3 $\alpha$ ,17 $\alpha$ -diol  | C <sub>19</sub> H <sub>32</sub> O <sub>2</sub> | 292.23968 |
| 5 $\beta$ -Androstane-3 $\alpha$ ,17 $\beta$ -diol   | C <sub>19</sub> H <sub>32</sub> O <sub>2</sub> | 292.23968 |
| 5 $\beta$ -Androstane-3 $\beta$ ,17 $\alpha$ -diol   | C <sub>19</sub> H <sub>32</sub> O <sub>2</sub> | 292.23968 |
| 5 $\beta$ -Androstane-3 $\beta$ ,17 $\beta$ -diol    | C <sub>19</sub> H <sub>32</sub> O <sub>2</sub> | 292.23968 |
| 6 $\alpha$ -Hydroxytestosterone                      | C <sub>19</sub> H <sub>28</sub> O <sub>3</sub> | 304.20330 |
| 6 $\beta$ -Hydroxytestosterone                       | C <sub>19</sub> H <sub>28</sub> O <sub>3</sub> | 304.20330 |
| 7 $\alpha$ -Hydroxydehydroepiandrosterone            | C <sub>19</sub> H <sub>28</sub> O <sub>3</sub> | 304.20330 |
| 7 $\alpha$ -Hydroxypregnenolone                      | C <sub>21</sub> H <sub>32</sub> O <sub>3</sub> | 332.23460 |
| 7 $\alpha$ -Hydroxytestosterone                      | C <sub>19</sub> H <sub>28</sub> O <sub>3</sub> | 304.20330 |
| 7 $\beta$ -Hydroxydehydroepiandrosterone             | C <sub>19</sub> H <sub>28</sub> O <sub>3</sub> | 304.20330 |
| Aldosterone                                          | C <sub>21</sub> H <sub>28</sub> O <sub>5</sub> | 360.19313 |
| Allopregnanolone                                     | C <sub>21</sub> H <sub>34</sub> O <sub>2</sub> | 318.25588 |
| Allotetrahydrocortisol                               | C <sub>21</sub> H <sub>34</sub> O <sub>5</sub> | 366.24008 |
| Androstenedione                                      | C <sub>19</sub> H <sub>26</sub> O <sub>2</sub> | 286.19273 |
| Androsterone                                         | C <sub>19</sub> H <sub>30</sub> O <sub>2</sub> | 290.22403 |
| Corticosterone                                       | C <sub>21</sub> H <sub>30</sub> O <sub>4</sub> | 346.21386 |
| Dehydroandrosterone                                  | C <sub>19</sub> H <sub>28</sub> O <sub>2</sub> | 288.20838 |
| Dehydroepiandrosterone                               | C <sub>19</sub> H <sub>28</sub> O <sub>2</sub> | 288.20838 |
| Dihydrotestosterone                                  | C <sub>19</sub> H <sub>30</sub> O <sub>2</sub> | 290.22403 |
| Epitestosterone                                      | C <sub>19</sub> H <sub>28</sub> O <sub>2</sub> | 288.20838 |
| Etiocholanolone                                      | C <sub>19</sub> H <sub>30</sub> O <sub>2</sub> | 290.22403 |
| Pregnanolone                                         | C <sub>21</sub> H <sub>34</sub> O <sub>2</sub> | 318.25533 |
| Pregnenolone                                         | C <sub>21</sub> H <sub>32</sub> O <sub>2</sub> | 316.23968 |
| Progesterone                                         | C <sub>21</sub> H <sub>30</sub> O <sub>2</sub> | 314.22403 |
| Testosterone                                         | C <sub>19</sub> H <sub>28</sub> O <sub>2</sub> | 288.20838 |
| Tetrahydrocortisone                                  | C <sub>21</sub> H <sub>32</sub> O <sub>5</sub> | 364.22443 |

**Table S2.** Calibration line equations obtained during the three days of quantitative validation protocol for all target analytes.

| Compound              | Calibration Line Equation               |                                        |                                        |
|-----------------------|-----------------------------------------|----------------------------------------|----------------------------------------|
|                       | Day 1                                   | Day 2                                  | Day 3                                  |
| <b>Beclomethasone</b> | $y=0.16566x+0.02315$ ( $R^2=0.99276$ )  | $y=0.16245x+0.02038$ ( $R^2=0.99416$ ) | $y=0.15872x+0.02564$ ( $R^2=0.99388$ ) |
| <b>Betamethasone</b>  | $y=0.09586x+0.00067$ ( $R^2=0.99175$ )  | $y=0.09209x+0.00065$ ( $R^2=0.99352$ ) | $y=0.09389x+0.00061$ ( $R^2=0.99435$ ) |
| <b>Budesonide</b>     | $y=0.12123x+0.01405$ ( $R^2=0.99332$ )  | $y=0.12458x+0.01722$ ( $R^2=0.99518$ ) | $y=0.11982x+0.01900$ ( $R^2=0.99614$ ) |
| <b>Cortisol</b>       | $y=0.06371x+0.28312$ ( $R^2=0.99456$ )  | $y=0.06459x+0.18898$ ( $R^2=0.99632$ ) | $y=0.06484x+0.24131$ ( $R^2=0.99511$ ) |
| <b>Cortisone</b>      | $y=0.26142x-0.033084$ ( $R^2=0.99231$ ) | $y=0.26366x-0.03790$ ( $R^2=0.99489$ ) | $y=0.25929x-0.02819$ ( $R^2=0.99656$ ) |
| <b>Dexamethasone</b>  | $y=0.09079x+0.01683$ ( $R^2=0.99721$ )  | $y=0.09241x+0.00835$ ( $R^2=0.99374$ ) | $y=0.08818x+0.01700$ ( $R^2=0.99456$ ) |
| <b>Flumethasone</b>   | $y=0.04325x+0.00212$ ( $R^2=0.99345$ )  | $y=0.04325x+0.00212$ ( $R^2=0.99345$ ) | $y=0.08818x+0.01700$ ( $R^2=0.99456$ ) |
| <b>Prednisone</b>     | $y=0.00878x+0.00073$ ( $R^2=0.99572$ )  | $y=0.00922x+0.00068$ ( $R^2=0.99313$ ) | $y=0.00899x+0.00063$ ( $R^2=0.99629$ ) |
| <b>Triamcinolone</b>  | $y=0.02810x+0.00507$ ( $R^2=0.99513$ )  | $y=0.02768x+0.00481$ ( $R^2=0.99294$ ) | $y=0.02882x+0.00546$ ( $R^2=0.99333$ ) |

**Table S3.** Stability of extracts stored for 3 and 7 days at 4 °C after the extraction.

|                | Sample  | Concentration [ng/mL] |       |              |       |              |
|----------------|---------|-----------------------|-------|--------------|-------|--------------|
|                |         | Day 0                 | Day 3 | Recovery [%] | Day 7 | Recovery [%] |
| Beclomethasone | Val5    | 28,7                  | 28,4  | 99,0%        | 28,0  | 97,6%        |
|                | Val5    | 29,1                  | 28,9  | 99,3%        | 28,4  | 97,6%        |
|                | Val5    | 28,9                  | 28,3  | 97,9%        | 27,7  | 95,8%        |
|                | Val5    | 29,3                  | 28,3  | 96,6%        | 27,4  | 93,5%        |
| Betamethasone  | Val5    | 25,3                  | 24,8  | 98,0%        | 24,6  | 97,2%        |
|                | Val5    | 24,7                  | 25,1  | 101,6%       | 24,8  | 100,4%       |
|                | Val5    | 24,3                  | 23,9  | 98,4%        | 23,3  | 95,9%        |
|                | Val5    | 25,2                  | 24,0  | 95,2%        | 22,9  | 90,9%        |
| Budesonide     | Val5    | 24,3                  | 23,8  | 97,9%        | 23,1  | 95,1%        |
|                | Val5    | 23,9                  | 24,0  | 100,4%       | 23,8  | 99,6%        |
|                | Val5    | 25,3                  | 24,4  | 96,4%        | 24,0  | 94,9%        |
|                | Val5    | 22,9                  | 22,7  | 99,1%        | 22,0  | 96,1%        |
| Cortisol       | QC High | 185,2                 | 171,3 | 92,5%        | 165,3 | 89,3%        |
|                | QC High | 167,8                 | 154,9 | 92,3%        | 155,8 | 92,8%        |
|                | QC High | 170,9                 | 165,9 | 97,1%        | 162,2 | 94,9%        |
|                | QC High | 178,1                 | 165,3 | 92,8%        | 165,5 | 92,9%        |
| Cortisone      | QC High | 44,1                  | 43,0  | 97,5%        | 41,6  | 94,3%        |
|                | QC High | 42,8                  | 42,1  | 98,4%        | 40,4  | 94,4%        |
|                | QC High | 43,5                  | 40,8  | 93,8%        | 41,3  | 94,9%        |
|                | QC High | 42,3                  | 41,4  | 97,9%        | 40,9  | 96,7%        |

|               |         |      |      |        |      |       |
|---------------|---------|------|------|--------|------|-------|
| Dexamethasone | QC High | 45,3 | 44,8 | 98,9%  | 43,9 | 96,9% |
|               | QC High | 44,9 | 43,7 | 97,3%  | 43,0 | 95,8% |
|               | QC High | 43,7 | 44,0 | 100,7% | 43,1 | 98,6% |
|               | QC High | 45,6 | 44,9 | 98,5%  | 44,2 | 96,9% |
| Flumethasone  | Val5    | 46,2 | 45,0 | 97,4%  | 44,6 | 96,5% |
|               | Val5    | 48,7 | 47,9 | 98,4%  | 48,1 | 98,8% |
|               | Val5    | 51,9 | 50,1 | 96,5%  | 51,2 | 98,7% |
|               | Val5    | 44,1 | 42,6 | 96,6%  | 42,9 | 97,3% |
| Prednisone    | Val5    | 27,4 | 27,0 | 98,5%  | 26,7 | 97,4% |
|               | Val5    | 28,8 | 28,1 | 97,6%  | 26,9 | 93,4% |
|               | Val5    | 31,5 | 30,1 | 95,6%  | 28,5 | 90,5% |
|               | Val5    | 29,9 | 27,4 | 91,6%  | 26,6 | 89,0% |
| Triamcinolone | Val5    | 52,7 | 50,3 | 95,4%  | 48,2 | 91,5% |
|               | Val5    | 47,9 | 46,6 | 97,3%  | 45,0 | 93,9% |
|               | Val5    | 50,6 | 51,2 | 101,2% | 49,9 | 98,6% |
|               | Val5    | 46,8 | 44,7 | 95,5%  | 44,2 | 94,4% |

**Table S4.** Summary of quantitative validation protocol parameters' acceptance criteria and results obtained for all target analytes.

| Parameter                         | Acceptance criteria                        | Beclomethasone | Betamethasone | Budesonide | Cortisol   | Cortisone  | Dexamethasone | Flumethasone | Prednisone | Trimacinolone |
|-----------------------------------|--------------------------------------------|----------------|---------------|------------|------------|------------|---------------|--------------|------------|---------------|
| <b>Selectivity</b>                | No interference (<20%LLOQ)                 | ✓              | ✓             | ✓          | ✓          | ✓          | ✓             | ✓            | ✓          | ✓             |
| <b>Linearity</b>                  | R <sup>2</sup> >0.99                       | ✓              | ✓             | ✓          | ✓          | ✓          | ✓             | ✓            | ✓          | ✓             |
| <b>Trueness [%]</b>               | 85-115 (80-120 LLOQ)                       | 94.2-106.3     | 98.8-105.4    | 93.6-104.9 | 97.8-105.5 | 95.6-105.6 | 98.6-105.9    | 93.2-108.4   | 96.6-106.3 | 94.8-105.0    |
| <b>Repeatability [%]</b>          | <15 (20 LLOQ)                              | 6.3-9.5        | 5.8-8.9       | 7.1-10.3   | 5.5-8.5    | 4.6-8.6    | 6.7-9.2       | 6.6-9.9      | 5.7-8.8    | 7.4-10.1      |
| <b>Intermediate Precision [%]</b> | <15 (20 LLOQ)                              | 6.1-10.1       | 6.2-9.5       | 8.3-11.1   | 5.3-9.2    | 5.2-8.8    | 6.1-9.6       | 7.2-10.8     | 6.2-9.9    | 7.6-10.4      |
| <b>Combined Uncertainty [%]</b>   | <20                                        | 8.4-12.5       | 9.1-13.4      | 9.9-14.0   | 8.4-12.1   | 7.4-12.2   | 11.4-13.6     | 8.5-13.6     | 8.4-14.1   | 8.8-12.8      |
| <b>LLOQ [pg/mL]</b>               |                                            | 500            | 500           | 500        | 1000       | 100        | 500           | 1000         | 250        | 1000          |
| <b>Robustness</b>                 | No impact of minor modifications           | ✓              | ✓             | ✓          | ✓          | ✓          | ✓             | ✓            | ✓          | ✓             |
| <b>Carry-over [%]</b>             | <1 in the 1 <sup>st</sup> blank afetr Cal6 | 0.4%           | 0.3%          | 0.3%       | 0.3%       | 0.6%       | 0.2%          | 0.4%         | 0.3%       | 0.5%          |
| <b>Stability of extracts [%]</b>  | 85-115 of Day 0 value                      | 93.5-97.6      | 90.9-100.4    | 94.9-99.6  | 89.3-94.9  | 94.3-96.7  | 95.8-98.6     | 96.5-98.8    | 89.0-97.4  | 91.5-98.6     |

**Table S5.** Calibration and validation samples composition (final concentration in serum).

| Compound       | Concentration [ng/mL] |           |           |           |           |           |
|----------------|-----------------------|-----------|-----------|-----------|-----------|-----------|
|                | Cal1/Val1             | Cal2/Val2 | Cal3/Val3 | Cal4/Val4 | Cal5/Val5 | Cal6/Val6 |
| Beclomethasone | 0.5                   | 2         | 7.5       | 15        | 30        | 75        |
| Betamethasone  | 0.5                   | 1.5       | 3         | 10        | 25        | 60        |
| Budesonide     | 0.5                   | 1.5       | 3         | 10        | 25        | 60        |
| Cortisol       | 1                     | 10        | 25        | 50        | 250       | 500       |
| Cortisone      | 0.1                   | 1         | 2.5       | 5         | 25        | 50        |
| Dexamethasone  | 0.5                   | 1.5       | 3         | 10        | 25        | 60        |
| Flumethasone   | 1                     | 5         | 10        | 25        | 50        | 100       |
| Prednisone     | 0.25                  | 1         | 2.5       | 10        | 30        | 75        |
| Triamcinolone  | 1                     | 5         | 10        | 25        | 50        | 100       |

**Table S6.** Internal Standard Mix composition (final concentration in serum).

| Compound         | Concentration [ng/mL] |
|------------------|-----------------------|
| Budesonide d8    | 10                    |
| Cortisol d4      | 15                    |
| Cortisone d8     | 5                     |
| Dexamethasone d3 | 5                     |
| Prednisone d8    | 10                    |
